# Supplementary material
Source: HighWire-hosted journal article supplement (https://cmaj.ca/highwire/filestream/150860/field_highwire_adjunct_files/1/231682-res-f1-fc-long-desc.pdf)
Supplement: 231682-res-f1-fc-long-desc.pdf [file 231682-res-f1-fc-long-desc.pdf]

HPV test

If Negative, arrow points to

Re-screen in 5 yr

HPV test

If Positive, high-risk HPV types other than 16 or 18, arrow points to

Reflex cytology

HPV test

If Positive, HPV type 16 or 18, arrow points to

Referral to colposcopy

Reflex cytology

If Positive, arrow points to

Referral to colposcopy

Reflex cytology

If Negative, arrow points to

Repeat HPV test, 1 yr

Repeat HPV test, 1 yr

If Negative, arrow points to

Re-screen in 5 yr

Repeat HPV test, 1 yr

If Positive, high-risk HPV types other than 16 or 18

And if Age < 50 yr, arrow points to

Reflex cytology

If Age  $\geq$  50 yr, arrow points to

Referral to colposcopy

Age < 50 yr

Reflex cytology

If Positive, arrow points to

Referral to colposcopy

Age < 50 yr

Reflex cytology

If Negative, arrow points to

Repeat HPV test, 1 yr

If Negative, arrow points to

Re-screen in 5 yr

If Positive, any high-risk HPV, arrow points to

Referral to colposcopy

Repeat HPV test, 1 yr

If Positive, HPV type 16 or 18, arrow points to

Referral to colposcopy
